# Supplementary material
Source: publisher figshare collection journal article supplement (https://frontiersin.figshare.com/ndownloader/files/21769503)
Supplement: Supplementary file 1 [file 21769503]

## Sheet: Sheet1
Supplementary Table S3. Transporters for organic sulfur
Transporter name	Transporter classification code	Transporter type	Reference sequence NCBI ID	Reference
L-methionine/D-methionine /N-acetyl-DL-methionine/L-methionine-(S)-S-oxide/L-methionine-(R)-S-oxide ABC transporter	3.A.1.24.1	ABC-type (ATP-binding cassette-type) transporter	metQ(NP_414739), metI(NP_414740), metN (NP_414741)	Merlin C, Gardiner G, Durand S, Masters M (2002). The Escherichia coli metD locus encodes an ABC transporter which includes Abc (MetN), YaeE (MetI), and YaeC (MetQ). J Bacteriol 184(19) 5513-5517.
L-cystine / D-cysteine/homocystine ABC transporter	3.A.1.3.10	ABC-type (ATP-binding cassette-type) transporter	tcyJ (NP_416430), tcyL (NP_416428), tcyN(NP_416427)	Kertesz MA (2001) Bacterial transporters for sulfate and organosulfur compounds. Res Microbiol 152(3-4) 279-290.
glutathione / L-cysteine ABC exporter CydDC	3.A.1.129.1	ABC-type (ATP-binding cassette-type) transporter	cydC(NP_415406),cydD(NP_415407)	Pittman MS, Robinson HC, Poole RK (2005). A bacterial glutathione transporter (Escherichia coli CydDC) exports reductant to the periplasm. J Biol Chem 280(37);32254-32261.
glutathione ABC transporter	3.A.1.5.11	ABC-type (ATP-binding cassette-type) transporter	gsiC(NP_415352), gsiD(NP_415353),gsiB(NP_415351),gsiA(NP_415350)	Suzuki H, Koyanagi T, Izuka S, Onishi A, Kumagai H (2005) The yliA, -B, -C, and -D genes of Escherichia coli K-12 encode a novel glutathione importer with an ATP-binding cassette. J Bacteriol 187(17);5861-7.
taurine ABC transporter	3.A.1.17.1	ABC-type (ATP-binding cassette-type) transporter	tauA(NP_414899), tauB(NP_414900), tauC(NP_414901)	Eichhorn E, van der Ploeg JR, Leisinger T (2000). Deletion analysis of the Escherichia coli taurine and alkanesulfonate transport systems. J Bacteriol 182(10) 2687-2695.
L-cystine/D-cysteine/S-sulfo-L-cysteine/homocystine:cation symporter	2.A.23.1.8	Dicarboxylate/Amino Acid:Cation Symporter (DAACS) family of transporters	tcyP(NC_000913)，ydjN(NP_416243)	Chonoles Imlay KR, Korshunov S, Imlay JA (2015) Physiological Roles and Adverse Effects of the Two Cystine Importers of Escherichia coli. J Bacteriol 197(23);3629-3644; Yamazaki S, Takei K, Nonaka G (2016) ydjN encodes an S-sulfocysteine transporter required by Escherichia coli for growth on S-sulfocysteine as a sulfur source. FEMS Microbiol Lett 363(17), doi: 10.1093/femsle/fnw185; Ohtsu I, Wiri…
cysteine/O-acetylserine exporter EamA	2.A.7.3.2/2.A.76.1.4	the drug/metabolite transporter (dmt) superfamily. the resistance to homoserine/threonine (rhtb) family.	eamA(NP_416050)ydeD, eamB(NP_417073) yfiK	Franke I, Resch A, Dassler T, Maier T, Bock A (2003) YfiK from Escherichia coli promotes export of O-acetylserine and cysteine. J Bacteriol 185(4) 1161-1166.
L-methionine/branched chain amino acid exporter	2.A.3.13.1	Amino Acid Efflux (AAE) Family within the Amino Acid-Polyamine-Organocation (APC) Superfamily of transporters	yjeH (NP_418565)	Liu Q, Liang Y, Zhang Y, Shang X, Liu S, Wen J, Wen T (2015). YjeH Is a Novel Exporter of l-Methionine and Branched-Chain Amino Acids in Escherichia coli. Appl Environ Microbiol 81(22) 7753-7766.
cystine exporter	2.A.7.3	drug/metabolite exporter (DME) family	yijE(NP_418378)	Korshunov S, Imlay KRC, Imlay JA (2019) Cystine import is a valuable but risky process whose hazards Escherichia coli minimizes by inducing a cysteine exporter. Mol Microbiol doi: 10.1111/mmi.14403.
S-methyl-L-methionine transporter	2.A.3.1.10	APC superfamily of amino acid transporter the amino acid-polyamine-organocation (apc) family.	mmuP(NP_414794)	Thanbichler M, Neuhierl B, Böck A (1999) S-methylmethionine metabolism in Escherichia coli. J Bacteriol 181(2) 662-665.
aliphatic sulfonate ABC transporter	3.A.1.17.10	ABC-type (ATP-binding cassette-type) transporter	ssuA(NP_415456),ssuB(NP_415453), ssuC(NP_415454)	van Der Ploeg JR, Iwanicka-Nowicka R, Bykowski T, Hryniewicz MM, Leisinger T (1999). The Escherichia coli ssuEADCB gene cluster is required for the utilization of sulfur from aliphatic sulfonates and is regulated by the transcriptional activator Cbl. J Biol Chem 274(41) 29358-29365.
dimethylsulfoniopropionate (DMSP) transporters	2.A.15.-	BCCT family transporter	dddT( WP_044050222)	Sun L, Curson ARJ, Todd JD, Johnston AWB (2011) Diversity of DMSP transport in marine bacteria, revealed by genetic analyses. Biogeochem 110(1-3) 121-130.
dihydroxypropanesulfonate (DHPS) TARP transporter	2.A.56.-	C4-dicarboxylate transport TRAP transporter	hpsK(WP_011046347), hpsL(WP_011046348), hpsM(WP_011046349)	Landa M, Burns AS, Roth SJ, Moran MA (2017). Bacterial transcriptome remodeling during sequential co-culture with a marine dinoflagellate and diatom. The ISME J11(12), 2677–2690.
